# Supplementary material for: Lactococcus lactis secreting phage lysins as a potential antimicrobial against multi-drug resistant Staphylococcus aureus
Source: PeerJ. 2022 Mar 1;10:e12648. doi: 10.7717/peerj.12648 (PMC8896023; doi:10.7717/peerj.12648)
Supplement: Supplemental Information 5 [file peerj-10-12648-s005.xlsx]

## Sheet: Sheet1
PS 88 + Uninduced Endolysin							PS 88 + Uninduced VAPGH							PS 88
TIME	MRSA 88 (E1)	MRSA 88 (E2)	MRSA 88 (E3)	Average	Std dev		TIME	MRSA 88 (V1)	MRSA 88 (V2)	MRSA 88 (V3)	Average	Std dev		TIME	MRSA 88 (1)	MRSA 88 (2)	MRSA 88 (3)	AVERAGE	std.d
0 min	0.762	0.749	0.745	0.752	0.00888819		0 min	0.712	0.729	0.725	0.722	0.00888819		0 min	0.709	0.729	0.725	0.721	0.00864099
5 min	0.786	0.758	0.756	0.766667	0.016773		5 min	0.726	0.748	0.746	0.74	0.0121655		5 min	0.73	0.738	0.736	0.734667	0.00339935
10 min	0.794	0.762	0.766	0.774	0.0174356		10 min	0.724	0.752	0.756	0.744	0.0174356		10 min	0.734	0.742	0.746	0.740667	0.00498888
15 min	0.809	0.831	0.835	0.825	0.014		15 min	0.739	0.771	0.775	0.761667	0.0197315		15 min	0.744	0.763	0.752	0.753	0.00778888
20 min	0.829	0.847	0.844	0.84	0.00964365		20 min	0.752	0.797	0.794	0.781	0.0251595		20 min	0.756	0.777	0.774	0.769	0.00927362
25 min	0.841	0.858	0.856	0.851667	0.00929157		25 min	0.771	0.818	0.816	0.801667	0.0265769		25 min	0.771	0.788	0.786	0.781667	0.00758654
30 min	0.861	0.864	0.867	0.864	0.003		30 min	0.795	0.844	0.847	0.828667	0.0291947		30 min	0.79	0.794	0.797	0.793667	0.00286744
35 min	0.882	0.888	0.892	0.887333	0.00503322		35 min	0.812	0.878	0.872	0.854	0.0364966		35 min	0.872	0.818	0.812	0.834	0.0269815
40 min	0.891	0.898	0.891	0.893333	0.00404145		40 min	0.838	0.898	0.891	0.875667	0.0328075		40 min	0.881	0.838	0.831	0.85	0.0221058
45 min	0.907	0.885	0.883	0.891667	0.0133167		45 min	0.852	0.915	0.913	0.893333	0.0358097		45 min	0.907	0.855	0.853	0.871667	0.0249978
50 min	0.938	0.922	0.924	0.928	0.0087178		50 min	0.878	0.932	0.934	0.914667	0.03177		50 min	0.928	0.872	0.874	0.891333	0.0259401
55 min	0.954	0.937	0.935	0.942	0.0104403		55 min	0.894	0.957	0.955	0.935333	0.0358097		55 min	0.934	0.897	0.895	0.908667	0.017932
60 min	0.974	0.958	0.952	0.961333	0.0113725		60 min	0.904	0.998	0.972	0.958	0.0485386		60 min	0.944	0.938	0.932	0.938	0.00489898
65 min	0.993	0.969	0.965	0.975667	0.0151438		65 min	0.923	0.999	0.995	0.972333	0.0427707		65 min	0.953	0.919	0.915	0.929	0.0170489
70 min	1.021	1.011	1.01	1.014	0.00608276		70 min	0.941	1.015	1.013	0.989667	0.0421584		70 min	0.963	0.936	0.935	0.944667	0.0129701
75 min	1.043	1.033	1.038	1.038	0.005		75 min	0.963	1.04	1.042	1.015	0.0450444		75 min	0.983	0.956	0.958	0.965667	0.0122837
80 min	1.069	1.064	1.068	1.067	0.00264575		80 min	0.985	1.054	1.058	1.03233	0.0410406		80 min	0.999	0.978	0.976	0.984333	0.010403
85 min	1.084	1.069	1.069	1.074	0.00866025		85 min	1.017	1.089	1.089	1.065	0.0415692		85 min	1.104	0.991	0.994	1.02967	0.0525759
90 min	1.109	1.092	1.085	1.09533	0.0123423		90 min	1.039	1.104	1.105	1.08267	0.0378197		90 min	1.106	1.002	1.005	1.03767	0.0483345
95 min	1.132	1.125	1.123	1.12667	0.00472582		95 min	1.052	1.125	1.123	1.1	0.0415812		95 min	1.108	1.007	1.003	1.03933	0.0485821
100 min	1.101	1.105	1.107	1.10433	0.00305505		100 min	1.071	1.105	1.107	1.09433	0.020232		100 min	1.11	1.014	1.012	1.04533	0.0457335
PS 88 + VAPGH							PS 88 + Endolysin
Time (min)	MRSA 88 + V1	MRSA + V2	MRSA +V3	Average	Std dev		Time (min)	MRSA 88 + E1	MRSA + E2	MRSA +E3	Average	Std dev
0	0.766	0.762	0.762	0.763333	0.0023094		0	0.768	0.762	0.765	0.765	0.003
5	0.758	0.755	0.759	0.757333	0.00208167		5	0.758	0.753	0.752	0.754333	0.00321455
10	0.715	0.724	0.726	0.721667	0.00585947		10	0.748	0.625	0.623	0.665333	0.0715984
15	0.685	0.657	0.666	0.669333	0.0142945		15	0.518	0.432	0.431	0.460333	0.0499433
20	0.673	0.61	0.612	0.631667	0.0358097		20	0.433	0.327	0.329	0.363	0.06063
25	0.652	0.586	0.574	0.604	0.042		25	0.369	0.291	0.292	0.317333	0.0447474
30	0.625	0.571	0.566	0.587333	0.0327159		30	0.291	0.245	0.246	0.260667	0.0262742
35	0.611	0.562	0.559	0.577333	0.0291947		35	0.283	0.235	0.234	0.250667	0.028006
40	0.597	0.547	0.544	0.562667	0.0297714		40	0.259	0.221	0.225	0.235	0.0208806
45	0.581	0.539	0.541	0.553667	0.0236925		45	0.248	0.212	0.219	0.226333	0.0190875
50	0.571	0.529	0.525	0.541667	0.025482		50	0.239	0.195	0.198	0.210667	0.0245832
55	0.561	0.515	0.511	0.529	0.0277849		55	0.225	0.187	0.185	0.199	0.0225389
60	0.556	0.519	0.513	0.529333	0.0232881		60	0.2	0.183	0.183	0.188667	0.00981495
65	0.549	0.495	0.486	0.51	0.0340735		65	0.198	0.179	0.181	0.186	0.0104403
70	0.531	0.485	0.481	0.499	0.0277849		70	0.187	0.175	0.167	0.176333	0.0100664
75	0.528	0.476	0.475	0.493	0.030315		75	0.185	0.153	0.155	0.164333	0.0179258
80	0.502	0.472	0.471	0.481667	0.0176163		80	0.183	0.149	0.151	0.161	0.0190788
85	0.492	0.453	0.455	0.466667	0.0219621		85	0.181	0.147	0.148	0.158667	0.0193477
90	0.483	0.436	0.433	0.450667	0.0280416		90	0.178	0.145	0.147	0.156667	0.0185023
95	0.463	0.43	0.428	0.440333	0.0196554		95	0.174	0.143	0.142	0.153	0.0181934
100	0.448	0.429	0.425	0.434	0.0122882		100	0.171	0.121	0.121	0.137667	0.0288675
