# Supplementary material for: Lactococcus lactis secreting phage lysins as a potential antimicrobial against multi-drug resistant Staphylococcus aureus
Source: PeerJ. 2022 Mar 1;10:e12648. doi: 10.7717/peerj.12648 (PMC8896023; doi:10.7717/peerj.12648)
Supplement: Supplemental Information 6 [file peerj-10-12648-s006.xlsx]

## Sheet: Sheet2
Uninduced (VAH88)
	SAMPLE1			SAMPLE 2			SAMPLE 3
Hours	R1	R2	R3	R1	R2	R3	R1	R2	R3	CFU/ml (1)	CFU/ml (2)	CFU/ml (3)	CFU/ml (1)	CFU/ml (2)	CFU/ml (3)	CFU/ml (1)	CFU/ml (2)	CFU/ml (3)	Average	std	Log CFU/ml (R1)	Log CFU/ml (R2)	Log CFU/ml (R3)	Log CFU/ml (R1)	Log CFU/ml (R2)	Log CFU/ml (R3)	Log CFU/ml (R1)	Log CFU/ml (R2)	Log CFU/ml (R3)	Average	std		T-test
0	300	278	298	311	302	298	321	314	297	3000000000	2780000000	2980000000	3110000000	3020000000	2980000000	3210000000	3140000000	2970000000	3.02111e+09	1.23637e+08	9.47712	9.44404	9.47422	9.49276	9.48001	9.47422	9.50651	9.49693	9.47276	9.47984	0.017931		2.33866e-08
2	282	276	182	276	265	255	276	285	266	2820000000	2760000000	1820000000	2760000000	2650000000	2550000000	2760000000	2850000000	2660000000	2.62556e+09	3.15995e+08	9.45025	9.44091	9.26007	9.44091	9.42325	9.40654	9.44091	9.45484	9.42488	9.41584	0.0602886		3.94033e-09
4	153	149	111	214	209	198	253	254	248	1530000000	1490000000	1110000000	2140000000	2090000000	1980000000	2530000000	2540000000	2480000000	1.98778e+09	5.12684e+08	9.18469	9.17319	9.04532	9.33041	9.32015	9.29667	9.40312	9.40483	9.39445	9.28365	0.124358		2.93086e-06
6	109	123	98	162	155	148	233	222	227	1090000000	1230000000	980000000	1620000000	1550000000	1480000000	2330000000	2220000000	2270000000	1.64111e+09	5.18374e+08	9.03743	9.08991	8.99123	9.20952	9.19033	9.17026	9.36736	9.34635	9.35603	9.19538	0.139993		1.46088e-05
8	88	69	52	122	111	99	198	188	172	880000000	690000000	520000000	1220000000	1110000000	990000000	1980000000	1880000000	1720000000	1.22111e+09	5.26152e+08	8.94448	8.83885	8.716	9.08636	9.04532	8.99564	9.29667	9.27416	9.23553	9.04811	0.199076		0.00101955
10	53	68	48	72	66	54	162	165	155	530000000	680000000	480000000	720000000	660000000	540000000	1620000000	1650000000	1550000000	9.36667e+08	5.08994e+08	8.72428	8.83251	8.68124	8.85733	8.81954	8.73239	9.20952	9.21748	9.19033	8.91829	0.222921		0.000779361
12	45	56	49	49	52	58	122	111	99	45000000	56000000	49000000	490000000	520000000	580000000	1220000000	1110000000	990000000	5.62222e+08	4.6236e+08	7.65321	7.74819	7.6902	8.6902	8.716	8.76343	9.08636	9.04532	8.99564	8.48762	0.609892		0.0224627
Induced (VAH88)
	SAMPLE 1			SAMPLE 2			SAMPLE 3
Hours	R1	R2	R3	R1	R2	R3	R1	R2	R3	CFU/ml (1)	CFU/ml (2)	CFU/ml (3)	CFU/ml (1)	CFU/ml (2)	CFU/ml (3)	CFU/ml (1)	CFU/ml (2)	CFU/ml (3)	Average	std	Log CFU/ml (R1)	Log CFU/ml (R2)	Log CFU/ml (R3)	Log CFU/ml (R1)	Log CFU/ml (R2)	Log CFU/ml (R3)	Log CFU/ml (R1)	Log CFU/ml (R2)	Log CFU/ml (R3)	Average	std
0	142	157	131	160	172	153	148	153	167	1420000000	1570000000	1310000000	1600000000	1720000000	1530000000	1480000000	1530000000	1670000000	1.53667e+09	1.249e+08	9.15229	9.1959	9.11727	9.20412	9.23553	9.18469	9.17026	9.18469	9.22272	9.18527	0.0359409
2	93	98	76	101	98	119	118	108	99	930000000	980000000	760000000	1010000000	980000000	1190000000	1180000000	1080000000	990000000	1.01111e+09	1.31e+08	8.96848	8.99123	8.88081	9.00432	8.99123	9.07555	9.07188	9.03342	8.99564	9.0014	0.0584855
4	73	69	59	92	89	79	74	89	62	730000000	690000000	590000000	920000000	890000000	790000000	740000000	890000000	620000000	7.62222e+08	1.19873e+08	8.86332	8.83885	8.77085	8.96379	8.94939	8.89763	8.86923	8.94939	8.79239	8.8772	0.0694323
6	43	35	42	82	68	74	53	48	55	430000000	350000000	420000000	820000000	680000000	740000000	530000000	480000000	550000000	5.55556e+08	1.5899e+08	8.63347	8.54407	8.62325	8.91381	8.83251	8.86923	8.72428	8.68124	8.74036	8.72914	0.123226
8	36	43	35	43	54	63	98	87	54	360000000	43000000	35000000	430000000	540000000	630000000	98000000	87000000	54000000	253000000	2.37192e+08	8.5563	7.63347	7.54407	8.63347	8.73239	8.79934	7.99123	7.93952	7.73239	8.17358	0.504048
10	162	153	168	44	57	62	54	47	39	1620000000	15300000	16800000	44000000	57000000	62000000	54000000	47000000	39000000	2.17233e+08	5.26293e+08	9.20952	7.18469	7.22531	7.64345	7.75587	7.79239	7.73239	7.6721	7.59106	7.75631	0.588379
12	130	118	127	45	38	32	178	186	163	1300000000	11800000	12700000	45000000	38000000	32000000	17800000	18600000	16300000	165800000	4.25487e+08	9.11394	7.07188	7.1038	7.65321	7.57978	7.50515	7.25042	7.26951	7.21219	7.52888	0.629055
Uninduced (Endo88)
	SAMPLE 1			SAMPLE 2			SAMPLE 3
Hours	R1	R2	R3	R1	R2	R3	R1	R2	R3	CFU/ML (1)	CFU/ml (2)	CFU/ml (3)	CFU/ml (1)	CFU/ml (2)	CFU/ml (3)	CFU/ml (1)	CFU/ml (2)	CFU/ml (3)	Average	std	Log CFU/ml (R1)	Log CFU/ml (R2)	Log CFU/ml (R3)	Log CFU/ml (R1)	Log CFU/ml (R2)	Log CFU/ml (R3)	Log CFU/ml (R1)	Log CFU/ml (R2)	Log CFU/ml (R3)	Average	std		T.TEST
0	110	93	96	211	208	198	222	217	208	11000000000	9300000000	9600000000	2110000000	2080000000	1980000000	2220000000	2170000000	2080000000	4.72667e+09	3.95664e+09	10.0414	9.96848	9.98227	9.32428	9.31806	9.29667	9.34635	9.33646	9.31806	9.548	0.337862		0.00412056
2	72	74	69	178	188	163	199	183	178	7200000000	7400000000	6900000000	1780000000	1880000000	1630000000	1990000000	1830000000	1780000000	3.59889e+09	2.68046e+09	9.85733	9.86923	9.83885	9.25042	9.27416	9.21219	9.29885	9.26245	9.25042	9.4571	0.299496		8.81394e-06
4	48	52	66	154	148	133	163	154	148	480000000	520000000	660000000	1540000000	1480000000	1330000000	1630000000	1540000000	1480000000	1.18444e+09	4.82185e+08	8.68124	8.716	8.81954	9.18752	9.17026	9.12385	9.21219	9.18752	9.17026	9.02982	0.222343		6.70776e-05
6	42	48	50	111	108	99	122	128	99	420000000	480000000	500000000	1110000000	1080000000	990000000	1220000000	1280000000	990000000	8.96667e+08	3.36564e+08	8.62325	8.68124	8.69897	9.04532	9.03342	8.99564	9.08636	9.10721	8.99564	8.91856	0.192561		3.13995e-05
8	158	163	172	72	88	69	83	84	72	158000000	163000000	172000000	720000000	880000000	690000000	830000000	840000000	720000000	5.74778e+08	3.14164e+08	8.19866	8.21219	8.23553	8.85733	8.94448	8.83885	8.91908	8.92428	8.85733	8.6653	0.339312		0.00252079
10	154	155	160	54	48	62	54	48	33	154000000	155000000	160000000	540000000	480000000	620000000	540000000	480000000	330000000	3.84333e+08	1.87494e+08	8.18752	8.19033	8.20412	8.73239	8.68124	8.79239	8.73239	8.68124	8.51851	8.52446	0.258661		4.25799e-06
12	148	130	129	155	132	148	99	72	65	148000000	130000000	129000000	155000000	132000000	148000000	99000000	72000000	65000000	1.19778e+08	3.33308e+07	8.17026	8.11394	8.11059	8.19033	8.12057	8.17026	7.99564	7.85733	7.81291	8.0602	0.139959		3.39811e-13
Induced (Endo88)
	SAMPLE 1			SAMPLE 2			SAMPLE 3
Hours	Reading 1	Reading 2	Reading 3	R1	R2	R3	R1	R2	R3	CFU/ml (1)	CFU/ml (2)	CFU/ml (3)	CFU/ml (1)	CFU/ml (2)	CFU/ml (3)	CFU/ml (1)	CFU/ml (2)	CFU/ml (3)	Average	std	Log CFU/ml (R1)	Log CFU/ml (R2)	Log CFU/ml (R3)	Log CFU/ml (R1)	Log CFU/ml (R2)	Log CFU/ml (R3)	Log CFU/ml (R1)	Log CFU/ml (R2)	Log CFU/ml (R3)	Average	std
0	123	101	119	120	132	127	144	103	113	1230000000	1010000000	1190000000	1200000000	1320000000	1270000000	1440000000	1030000000	1130000000	1.20222e+09	1.2813e+08	9.08991	9.00432	9.07555	9.07918	9.12057	9.1038	9.15836	9.01284	9.05308	9.07751	0.049218
2	250	243	211	150	172	153	332	349	352	250000000	243000000	211000000	150000000	172000000	153000000	332000000	349000000	352000000	2.45778e+08	8.20301e+07	8.39794	8.38561	8.32428	8.17609	8.23553	8.18469	8.52114	8.54283	8.54654	8.36829	0.14874
4	198	188	172	74	69	82	165	183	143	198000000	188000000	172000000	74000000	69000000	82000000	165000000	183000000	143000000	1.41556e+08	5.23381e+07	8.29667	8.27416	8.23553	7.86923	7.83885	7.91381	8.21748	8.26245	8.15534	8.11817	0.188341
6	150	120	111	39	42	53	84	79	72	150000000	120000000	111000000	39000000	42000000	53000000	84000000	79000000	72000000	8.33333e+07	3.75766e+07	8.17609	8.07918	8.04532	7.59106	7.62325	7.72428	7.92428	7.89763	7.85733	7.87982	0.203444
8	93	87	94	74	54	39	49	52	63	93000000	87000000	94000000	7400000	5400000	3900000	49000000	52000000	63000000	5.05222e+07	3.75078e+07	7.96848	7.93952	7.97313	6.86923	6.73239	6.59106	7.6902	7.716	7.79934	7.47548	0.571925
10	35	38	37	87	69	58	44	53	32	350000	380000	370000	870000	69000	58000	4400000	5300000	3200000	1.66633e+06	2.05757e+06	5.54407	5.57978	5.5682	5.93952	4.83885	4.76343	6.64345	6.72428	6.50515	5.78964	0.728651
12	33	39	32	39	36	32	34	32	30	33000	39000	32000	39000	36000	32000	34000	32000	30000	34111.1	3218.87	4.51851	4.59106	4.50515	4.59106	4.5563	4.50515	4.53148	4.50515	4.47712	4.53122	0.0401855
Dilution
Uninduced (VAH88) S1										Uninduced (VAH88) S2										Uninduced (VAH88) S3
Hours	10^1	10^2	10^3	10^4	10^5	10^6	10^7	10^8		Hours	10^1	10^2	10^3	10^4	10^5	10^6	10^7	10^8		Hours	10^1	10^2	10^3	10^4	10^5	10^6	10^7	10^8
0 hour	TNTC	TNTC	TNTC	367	300	62	0	0		0 hour	TNTC	TNTC	TNTC	352	311	88	0	0		0 hour	TNTC	TNTC	TNTC	350	321	90	0	0
0 hour	TNTC	TNTC	TNTC	355	278	56	0	0		0 hour	TNTC	TNTC	TNTC	368	302	92	0	0		0 hour	TNTC	TNTC	TNTC	348	314	88	0	0
0 hour	TNTC	TNTC	TNTC	358	298	59	0	0		0 hour	TNTC	TNTC	TNTC	372	298	79	0	0		0 hour	TNTC	TNTC	TNTC	362	297	95	0	0
2 hour	TNTC	TNTC	TNTC	348	282	48	0	0		2 hour	TNTC	TNTC	TNTC	332	276	64	0	0		2 hour	TNTC	TNTC	TNTC	340	276	64	0	0
2 hour	TNTC	TNTC	TNTC	350	276	45	0	0		2 hour	TNTC	TNTC	TNTC	328	265	73	0	0		2 hour	TNTC	TNTC	TNTC	333	285	69	0	0
2 hour	TNTC	TNTC	TNTC	334	182	52	0	0		2 hour	TNTC	TNTC	TNTC	321	255	68	0	0		2 hour	TNTC	TNTC	TNTC	348	266	72	0	0
4 hour	TNTC	TNTC	TNTC	245	153	37	0	0		4 hour	TNTC	TNTC	TNTC	298	214	56	0	0		4 hour	TNTC	TNTC	TNTC	293	253	48	0	0
4 hour	TNTC	TNTC	TNTC	267	149	31	0	0		4 hour	TNTC	TNTC	TNTC	288	209	60	0	0		4 hour	TNTC	TNTC	TNTC	281	254	54	0	0
4 hour	TNTC	TNTC	TNTC	272	111	28	0	0		4 hour	TNTC	TNTC	TNTC	267	198	51	0	0		4 hour	TNTC	TNTC	TNTC	292	248	62	0	0
6 hour	TNTC	TNTC	TNTC	196	109	18	0	0		6 hour	TNTC	TNTC	TNTC	232	162	46	0	0		6 hour	TNTC	TNTC	TNTC	268	233	32	0	0
6 hour	TNTC	TNTC	TNTC	185	123	20	0	0		6 hour	TNTC	TNTC	TNTC	221	155	39	0	0		6 hour	TNTC	TNTC	TNTC	272	222	28	0	0
6 hour	TNTC	TNTC	TNTC	142	98	23	0	0		6 hour	TNTC	TNTC	TNTC	211	148	42	0	0		6 hour	TNTC	TNTC	TNTC	279	227	21	0	0
8 hour	TNTC	TNTC	350	172	88	8	0	0		8 hour	TNTC	TNTC	350	188	122	30	0	0		8 hour	TNTC	TNTC	367	254	198	18	0	0
8 hour	TNTC	TNTC	367	179	69	7	0	0		8 hour	TNTC	TNTC	372	177	111	28	0	0		8 hour	TNTC	TNTC	382	232	188	11	0	0
8 hour	TNTC	TNTC	352	150	52	6	0	0		8 hour	TNTC	TNTC	368	165	99	18	0	0		8 hour	TNTC	TNTC	353	217	172	9	0	0
10 hour	TNTC	TNTC	310	133	53	2	0	0		10 hour	TNTC	TNTC	315	144	72	12	0	0		10 hour	TNTC	TNTC	320	198	162	7	0	0
10 hour	TNTC	TNTC	308	81	48	3	0	0		10 hour	TNTC	TNTC	298	158	66	9	0	0		10 hour	TNTC	TNTC	311	188	165	3	0	0
10 hour	TNTC	TNTC	299	91	68	1	0	0		10 hour	TNTC	TNTC	288	162	54	7	0	0		10 hour	TNTC	TNTC	298	172	155	2	0	0
12 hour	TNTC	TNTC	254	45	32	0	0	0		12 hour	TNTC	TNTC	262	143	49	3	0	0		12 hour	TNTC	TNTC	272	163	122	1	0	0
12 hour	TNTC	TNTC	223	56	37	0	0	0		12 hour	TNTC	TNTC	248	122	52	1	0	0		12 hour	TNTC	TNTC	270	154	111	0	0	0
12 hour	TNTC	TNTC	243	49	23	0	0	0		12 hour	TNTC	TNTC	271	111	58	2	0	0		12 hour	TNTC	TNTC	253	166	99	0	0	0
Induced (VAH88) S1										Induced (VAH88) S2										Induced (VAH88) S3
Hours	10^1	10^2	10^3	10^4	10^5	10^6	10^7	10^8		Hours	10^1	10^2	10^3	10^4	10^5	10^6	10^7	10^8		Hours	10^1	10^2	10^3	10^4	10^5	10^6	10^7	10^8
0 hour	TNTC	TNTC	TNTC	387	142	54	0	0		0 hour	TNTC	TNTC	TNTC	TNTC	160	62	0	0		0 hour	TNTC	TNTC	TNTC	TNTC	148	54	0	0
0 hour	TNTC	TNTC	TNTC	360	157	48	0	0		0 hour	TNTC	TNTC	TNTC	TNTC	172	48	0	0		0 hour	TNTC	TNTC	TNTC	TNTC	153	50	0	0
0 hour	TNTC	TNTC	TNTC	358	131	62	0	0		0 hour	TNTC	TNTC	TNTC	TNTC	153	74	0	0		0 hour	TNTC	TNTC	TNTC	TNTC	167	62	0	0
2 hour	TNTC	TNTC	TNTC	131	93	33	0	0		2 hour	TNTC	TNTC	TNTC	372	101	43	0	0		2 hour	TNTC	TNTC	TNTC	363	118	42	0	0
2 hour	TNTC	TNTC	TNTC	199	98	45	0	0		2 hour	TNTC	TNTC	TNTC	368	98	38	0	0		2 hour	TNTC	TNTC	TNTC	358	108	45	0	0
2 hour	TNTC	TNTC	TNTC	120	76	39	0	0		2 hour	TNTC	TNTC	TNTC	376	119	55	0	0		2 hour	TNTC	TNTC	TNTC	369	99	39	0	0
4 hour	TNTC	TNTC	358	82	73	18	0	0		4 hour	TNTC	TNTC	362	182	92	22	0	0		4 hour	TNTC	TNTC	347	210	74	28	0	0
4 hour	TNTC	TNTC	362	79	69	22	0	0		4 hour	TNTC	TNTC	372	176	89	19	0	0		4 hour	TNTC	TNTC	362	222	89	21	0	0
4 hour	TNTC	TNTC	348	93	59	29	0	0		4 hour	TNTC	TNTC	369	152	79	24	0	0		4 hour	TNTC	TNTC	348	203	62	32	0	0
6 hour	TNTC	TNTC	280	72	43	12	0	0		6 hour	TNTC	TNTC	320	101	82	15	0	0		6 hour	TNTC	TNTC	333	158	53	18	0	0
6 hour	TNTC	TNTC	271	58	35	9	0	0		6 hour	TNTC	TNTC	338	119	68	17	0	0		6 hour	TNTC	TNTC	311	148	48	12	0	0
6 hour	TNTC	TNTC	263	64	42	7	0	0		6 hour	TNTC	TNTC	348	123	74	20	0	0		6 hour	TNTC	TNTC	329	127	55	15	0	0
8 hour	TNTC	TNTC	222	36	21	5	0	0		8 hour	TNTC	TNTC	298	90	43	12	0	0		8 hour	TNTC	TNTC	272	110	33	8	0	0
8 hour	TNTC	TNTC	201	43	32	4	0	0		8 hour	TNTC	TNTC	274	89	54	9	0	0		8 hour	TNTC	TNTC	288	98	28	3	0	0
8 hour	TNTC	TNTC	198	35	29	2	0	0		8 hour	TNTC	TNTC	286	82	63	7	0	0		8 hour	TNTC	TNTC	262	87	42	5	0	0
10 hour	TNTC	TNTC	162	18	21	1	0	0		10 hour	TNTC	TNTC	210	44	28	2	0	0		10 hour	TNTC	TNTC	220	54	21	1	0	0
10 hour	TNTC	TNTC	153	20	18	0	0	0		10 hour	TNTC	TNTC	240	57	32	3	0	0		10 hour	TNTC	TNTC	238	47	18	0	0	0
10 hour	TNTC	TNTC	168	21	10	1	0	0		10 hour	TNTC	TNTC	236	62	18	5	0	0		10 hour	TNTC	TNTC	215	39	15	1	0	0
12 hour	TNTC	TNTC	130	1	5	0	0	0		12 hour	TNTC	TNTC	198	45	7	0	0	0		12 hour	TNTC	TNTC	178	20	9	0	0	0
12 hour	TNTC	TNTC	118	2	2	1	0	0		12 hour	TNTC	TNTC	188	38	9	1	0	0		12 hour	TNTC	TNTC	186	23	4	1	0	0
12 hour	TNTC	TNTC	127	1	3	1	0	0		12 hour	TNTC	TNTC	172	32	5	2	0	0		12 hour	TNTC	TNTC	163	18	6	1	0	0
Uninduced (Endo88) S1										Uninduced (Endo88) S2										Uninduced (Endo88) S3
Hours	10^1	10^2	10^3	10^4	10^5	10^6	10^7	10^8		Hours	10^1	10^2	10^3	10^4	10^5	10^6	10^7	10^8		Hours	10^1	10^2	10^3	10^4	10^5	10^6	10^7	10^8
0 hour	TNTC	TNTC	TNTC	302	350	110	0	0		0 hour	TNTC	TNTC	TNTC	344	211	88	0	0		0 hour	TNTC	TNTC	TNTC	350	222	93	0	0
0 hour	TNTC	TNTC	TNTC	378	352	93	0	0		0 hour	TNTC	TNTC	TNTC	346	208	92	0	0		0 hour	TNTC	TNTC	TNTC	349	217	72	0	0
0 hour	TNTC	TNTC	TNTC	384	351	96	0	0		0 hour	TNTC	TNTC	TNTC	350	198	72	0	0		0 hour	TNTC	TNTC	TNTC	347	208	84	0	0
2 hour	TNTC	TNTC	TNTC	299	162	72	0	0		2 hour	TNTC	TNTC	TNTC	286	178	69	0	0		2 hour	TNTC	TNTC	TNTC	265	199	55	0	0
2 hour	TNTC	TNTC	TNTC	289	172	74	0	0		2 hour	TNTC	TNTC	TNTC	276	188	54	0	0		2 hour	TNTC	TNTC	TNTC	254	183	62	0	0
2 hour	TNTC	TNTC	TNTC	287	160	69	0	0		2 hour	TNTC	TNTC	TNTC	292	163	62	0	0		2 hour	TNTC	TNTC	TNTC	247	178	48	0	0
4 hour	TNTC	TNTC	TNTC	239	48	48	0	0		4 hour	TNTC	TNTC	TNTC	266	154	32	0	0		4 hour	TNTC	TNTC	TNTC	232	163	32	0	0
4 hour	TNTC	TNTC	TNTC	179	52	39	0	0		4 hour	TNTC	TNTC	TNTC	258	148	27	0	0		4 hour	TNTC	TNTC	TNTC	221	154	35	0	0
4 hour	TNTC	TNTC	TNTC	159	66	28	0	0		4 hour	TNTC	TNTC	TNTC	263	133	16	0	0		4 hour	TNTC	TNTC	TNTC	211	148	29	0	0
6 hour	TNTC	TNTC	TNTC	162	42	18	0	0		6 hour	TNTC	TNTC	TNTC	242	111	12	0	0		6 hour	TNTC	TNTC	TNTC	199	122	12	0	0
6 hour	TNTC	TNTC	TNTC	142	48	7	0	0		6 hour	TNTC	TNTC	TNTC	232	108	9	0	0		6 hour	TNTC	TNTC	TNTC	189	128	17	0	0
6 hour	TNTC	TNTC	TNTC	148	50	12	0	0		6 hour	TNTC	TNTC	TNTC	221	99	8	0	0		6 hour	TNTC	TNTC	TNTC	163	99	8	0	0
8 hour	TNTC	TNTC	253	158	38	2	0	0		8 hour	TNTC	TNTC	264	211	72	5	0	0		8 hour	TNTC	TNTC	253	155	83	6	0	0
8 hour	TNTC	TNTC	246	163	30	5	0	0		8 hour	TNTC	TNTC	273	208	88	3	0	0		8 hour	TNTC	TNTC	260	143	84	4	0	0
8 hour	TNTC	TNTC	228	172	22	3	0	0		8 hour	TNTC	TNTC	254	233	69	2	0	0		8 hour	TNTC	TNTC	272	133	72	2	0	0
10 hour	TNTC	TNTC	218	154	25	1	0	0		10 hour	TNTC	TNTC	221	198	54	2	0	0		10 hour	TNTC	TNTC	232	128	54	3	0	0
10 hour	TNTC	TNTC	205	155	14	0	0	0		10 hour	TNTC	TNTC	218	174	48	0	0	0		10 hour	TNTC	TNTC	245	111	48	2	0	0
10 hour	TNTC	TNTC	203	160	7	2	0	0		10 hour	TNTC	TNTC	237	165	62	0	0	0		10 hour	TNTC	TNTC	255	108	33	0	0	0
12 hour	TNTC	TNTC	153	148	2	1	0	0		12 hour	TNTC	TNTC	188	155	33	1	0	0		12 hour	TNTC	TNTC	217	99	28	0	0	0
12 hour	TNTC	TNTC	167	130	2	0	0	0		12 hour	TNTC	TNTC	172	132	28	0	0	0		12 hour	TNTC	TNTC	193	72	17	0	0	0
12 hour	TNTC	TNTC	188	129	1	0	0	0		12 hour	TNTC	TNTC	169	148	19	0	0	0		12 hour	TNTC	TNTC	184	65	12	0	0	0
Induced (Endo88) S1										Induced (Endo88) S3										Induced (Endo88) S3
Hours	10^1	10^2	10^3	10^4	10^5	10^6	10^7	10^8		Hours	10^1	10^2	10^3	10^4	10^5	10^6	10^7	10^8		Hours	10^1	10^2	10^3	10^4	10^5	10^6	10^7	10^8
0 hour	TNTC	TNTC	TNTC	372	123	28	0	0		0 hour	TNTC	TNTC	354	329	120	22	0	0		0 hour	TNTC	TNTC	TNTC	356	144	25	0	0
0 hour	TNTC	TNTC	TNTC	368	101	15	0	0		0 hour	TNTC	TNTC	340	339	132	19	0	0		0 hour	TNTC	TNTC	TNTC	376	103	21	0	0
0 hour	TNTC	TNTC	TNTC	353	119	23	0	0		0 hour	TNTC	TNTC	282	225	127	30	0	0		0 hour	TNTC	TNTC	TNTC	387	113	32	0	0
2 hour	TNTC	TNTC	263	250	35	11	0	0		2 hour	TNTC	TNTC	188	150	25	10	0	0		2 hour	TNTC	TNTC	325	332	27	12	0	0
2 hour	TNTC	TNTC	254	243	32	9	0	0		2 hour	TNTC	TNTC	172	172	23	8	0	0		2 hour	TNTC	TNTC	355	349	32	10	0	0
2 hour	TNTC	TNTC	199	211	29	7	0	0		2 hour	TNTC	TNTC	169	153	19	5	0	0		2 hour	TNTC	TNTC	345	352	19	17	0	0
4 hour	320	TNTC	148	198	22	0	0	0		4 hour	TNTC	343	133	74	12	4	0	0		4 hour	333	TNTC	311	165	13	7	0	0
4 hour	319	358	150	188	18	1	0	0		4 hour	TNTC	311	129	69	8	7	0	0		4 hour	346	320	280	183	9	6	0	0
4 hour	299	297	167	172	7	2	0	0		4 hour	TNTC	328	142	82	7	2	0	0		4 hour	365	335	199	143	8	9	0	0
6 hour	288	138	99	150	14	0	0	0		6 hour	313	230	103	39	4	2	0	0		6 hour	281	270	143	84	5	3	0	0
6 hour	200	110	72	120	7	0	0	0		6 hour	320	217	99	42	3	3	0	0		6 hour	273	240	139	79	2	3	0	0
6 hour	199	99	65	111	8	0	0	0		6 hour	333	208	121	53	2	1	0	0		6 hour	254	218	152	72	3	2	0	0
8 hour	109	54	33	93	5	0	0	0		8 hour	228	110	74	13	1	1	0	0		8 hour	183	99	123	49	1	1	0	0
8 hour	99	48	29	87	3	0	0	0		8 hour	183	123	54	28	0	1	0	0		8 hour	169	100	109	52	1	1	0	0
8 hour	83	67	21	94	1	0	0	0		8 hour	176	143	39	25	1	0	0	0		8 hour	199	123	133	63	0	0	0	0
10 hour	78	35	32	33	0	0	0	0		10 hour	100	87	33	7	0	0	0	0		10 hour	121	67	44	23	1	0	0	0
10 hour	55	38	18	26	2	0	0	0		10 hour	88	69	29	12	0	0	0	0		10 hour	88	52	53	38	0	0	0	0
10 hour	65	37	39	37	1	0	0	0		10 hour	99	58	18	10	0	0	0	0		10 hour	93	41	32	29	0	0	0	0
12 hour	33	21	24	15	1	0	0	0		12 hour	39	32	13	3	0	0	0	0		12 hour	34	33	22	8	0	0	0	0
12 hour	39	19	17	8	0	0	0	0		12 hour	36	42	10	4	0	0	0	0		12 hour	32	22	18	13	0	0	0	0
12 hour	32	33	25	11	0	0	0	0		12 hour	32	29	9	5	0	0	0	0		12 hour	30	29	19	15	0	0	0	0
