# Supplementary material for: Lactococcus lactis secreting phage lysins as a potential antimicrobial against multi-drug resistant Staphylococcus aureus
Source: PeerJ. 2022 Mar 1;10:e12648. doi: 10.7717/peerj.12648 (PMC8896023; doi:10.7717/peerj.12648)
Supplement: Supplemental Information 7 [file peerj-10-12648-s007.xlsx]

## Sheet: Sheet1
Sample of bacteria	Observation 1	Observation 2	Obervation 3	Average	Std dev
MRSA 6	10.4	10	10.2	10.2	0.163299
MRSA 7	11.3	11.4	11.1	11.2667	0.124722
MRSA 8	11.5	11.4	11.7	11.5333	0.124722
MRSA 10	13.6	13.3	13.9	13.6	0.244949
MRSA 12	15	14	14.5	14.5	0.408248
MRSA 20	13	14	14.8	13.9333	0.736357
S. epidermidis	16	15	16	15.6667	0.471405
L. lactis (NZ9000)	0	0	0	0	0
S. agalactiae serotype 2	0	0	0	0	0
S. agalactiae serotype 3	0	0	0	0	0
E. coli	0	0	0	0	0
